# Supplementary material for: Membrane-Localized Mutations Predict the Efficacy of Cancer Immunotherapy
Source: bioRxiv or medRxiv preprint supplement (doi:10.1101/2022.05.28.22275728), 2022-05-29
Supplement: Supplementary file [file media-1.pdf]

# 1           **Membrane-Localized Mutations Predict the** 2           **Efficacy of Cancer Immunotherapy**

3  
4 Priscilla S. Briquez<sup>1+</sup>, Sylvie Hauert<sup>1 \*</sup>, Zoe Goldberger<sup>1,2 \*</sup>, Trevin Kurtanich<sup>1</sup>,  
5 Aaron T. Alpar<sup>1</sup>, Grégoire Repond<sup>1</sup>, Yue Wang<sup>1</sup>, Suzana Gomes<sup>1</sup>, Prabha  
6 Siddarth<sup>3</sup>, Melody A. Swartz<sup>1,4,5,6</sup>, Jeffrey A. Hubbell<sup>1,5,6+</sup>

7  
8 \* These authors contributed equally to this work

9 † Correspondence: [jhubbell@uchicago.edu](mailto:jhubbell@uchicago.edu), [pbriquez@uchicago.edu](mailto:pbriquez@uchicago.edu)

## 10 11 **Affiliations:**

12 <sup>1</sup> Pritzker School of Molecular Engineering, University of Chicago, Chicago, IL, USA

13 <sup>2</sup> Department of Bioengineering, McGill University, Montreal, QC, Canada

14 <sup>3</sup> Semel Institute for Neuroscience & Human Behavior, UCLA, Los Angeles, CA, USA

15 <sup>4</sup> Ben May Department of Cancer Research, University of Chicago, Chicago, IL, USA

16 <sup>5</sup> Committee on Immunology, University of Chicago, Chicago, IL, USA

17 <sup>6</sup> Committee on Cancer Biology, University of Chicago, Chicago, IL, USA

18

19 **SUPPLEMENTARY INFORMATION**

20

21 **Supplementary Data 1:** Subcellular locations of proteins associated with *Homo*  
22 *Sapiens* genes.

23 **Supplementary Data 2:** Proportion of mutations at specific location for ICI-treated  
24 cohort from Samstein *et al.*<sup>7</sup>

25 **Supplementary Data 3:** Proportion of mutations at specific location for the non-ICI-  
26 treated cohort from Samstein *et al.*<sup>7</sup>

27 **Supplementary Data 4:** Proportion of mutations at specific location for the NSCLC  
28 patients cohort from Hellman *et al.*<sup>8</sup>

29 **Supplementary Data 5:** Proportion of mutations at specific location for the  
30 melanoma patients cohort from Hugo *et al.*<sup>9</sup>

31 **Supplementary Data 6:** HR of survival per mutated genes and per cancer type for  
32 the ICI and non-ICI treated patients cohort from Samstein *et al.*<sup>7</sup>

33

34

35

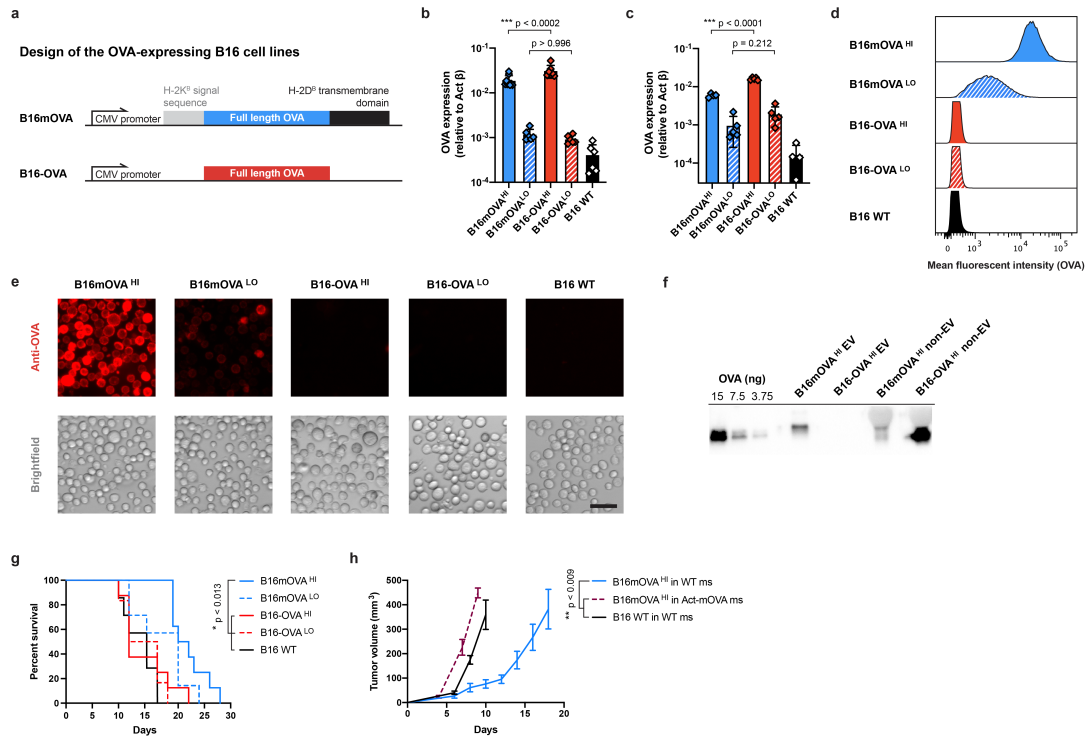

**Supplementary Fig. 1. Characterization of OVA-expressing B16-F10 melanoma cell lines and tumors.** **a**, Design of the different OVA-expressing B16-F10 cell lines, expressing membrane OVA (mOVA) or soluble OVA. **b**, OVA expression in the modified B16 cell lines in culture *in vitro*, assessed by qPCR ( $N \geq 6$ , mean  $\pm$  SD, ANOVA with Sidak's post-test). **c**, OVA expression in the modified B16 tumors *in vivo*, assessed by qPCR ( $N \geq 4$ , mean  $\pm$  SD, ANOVA with Sidak's post-test). **d**, Cell-surface staining of OVA quantified by flow cytometry via the mean fluorescence intensity. **e**, Detection of cell plasma membrane-bound OVA on the different OVA-expressing B16 cell lines assessed by microscopy (red: anti-OVA; scale bar = 50 μm). **f**, Western blot analysis for OVA detection in the extracellular vesicles (EV) produced *in vitro* by B16mOVA<sup>HI</sup> or B16-OVA<sup>HI</sup> cell lines or in the non-EV fraction (black = positive detection of OVA). **g**, Survival of mice injected with the different OVA-expressing cell lines, associated to the tumor growth curves of Fig. 1a ( $N \geq 8$ , log-rank tests with Holm-Bonferroni p-values adjustment). **h**, Tumor growth of B16mOVA<sup>HI</sup> in Act-mOVA mice as compared to growth in wild-type (WT) mice ( $N \geq 3$ , mean  $\pm$  SEM, Kruskal-Wallis with Dunn's post-test at day 10).

36

37

38

39

40

41

42

43

44

45

46

47

48

49

50

51

52

53

54

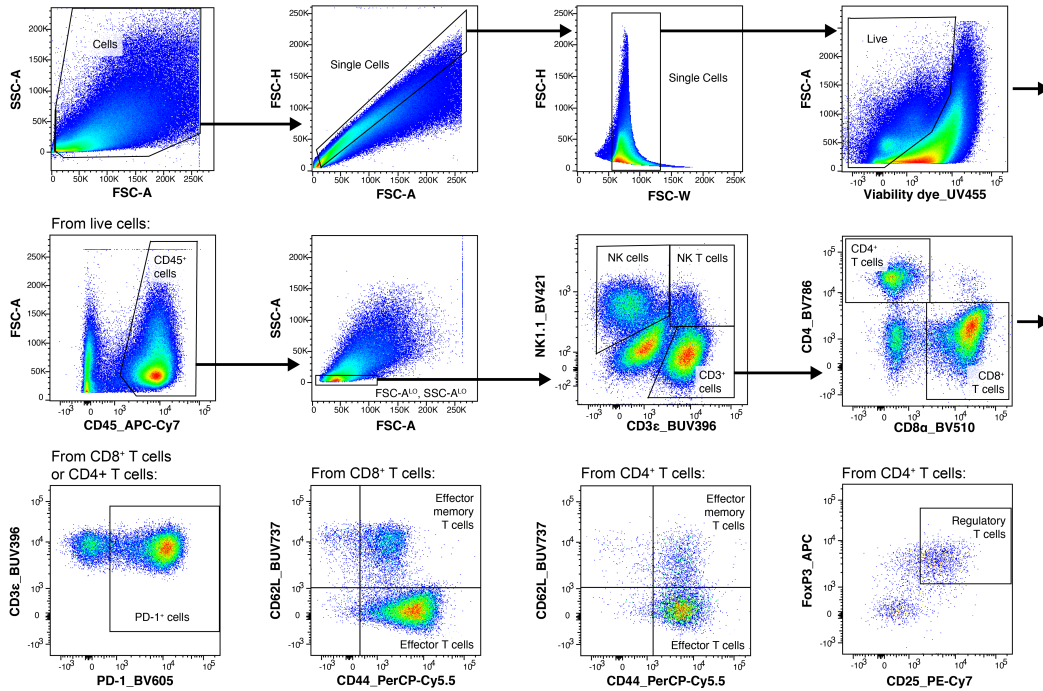

55

56

57 **Supplementary Fig. 2. Gating strategy for the characterization of T and NK cells.** Multi-  
 58 colored flow cytometry was used to analyze the subsets of T and NK cells in the tumors at  
 59 day 10 post-injection. Subset of immune cells were defined using the following markers:  
 60 NK cells (FSC<sup>LO</sup>, SSC<sup>LO</sup>, CD45<sup>+</sup>, NK1.1<sup>+</sup>, CD3ε<sup>-</sup>), NK T cells (FSC<sup>LO</sup>, SSC<sup>LO</sup>, CD45<sup>+</sup>, CD3ε<sup>+</sup>,  
 61 NK1.1<sup>+</sup>), CD8<sup>+</sup> T cells (FSC<sup>LO</sup>, SSC<sup>LO</sup>, CD45<sup>+</sup>, NK1.1<sup>-</sup>, CD3ε<sup>+</sup>, CD8<sup>+</sup>), CD4<sup>+</sup> T cells (FSC<sup>LO</sup>,  
 62 SSC<sup>LO</sup>, CD45<sup>+</sup>, NK1.1<sup>-</sup>, CD3ε<sup>+</sup>, CD8<sup>+</sup>), effector T cells (same markers than T cells with  
 63 CD44<sup>+</sup>, CD62L<sup>-</sup>), effector memory T cells (same markers than T cells with CD44<sup>+</sup>, CD62L<sup>+</sup>).  
 64 regulatory T cells (same as CD4<sup>+</sup> T cells with CD25<sup>+</sup>, FoxP3<sup>+</sup>).

65

66



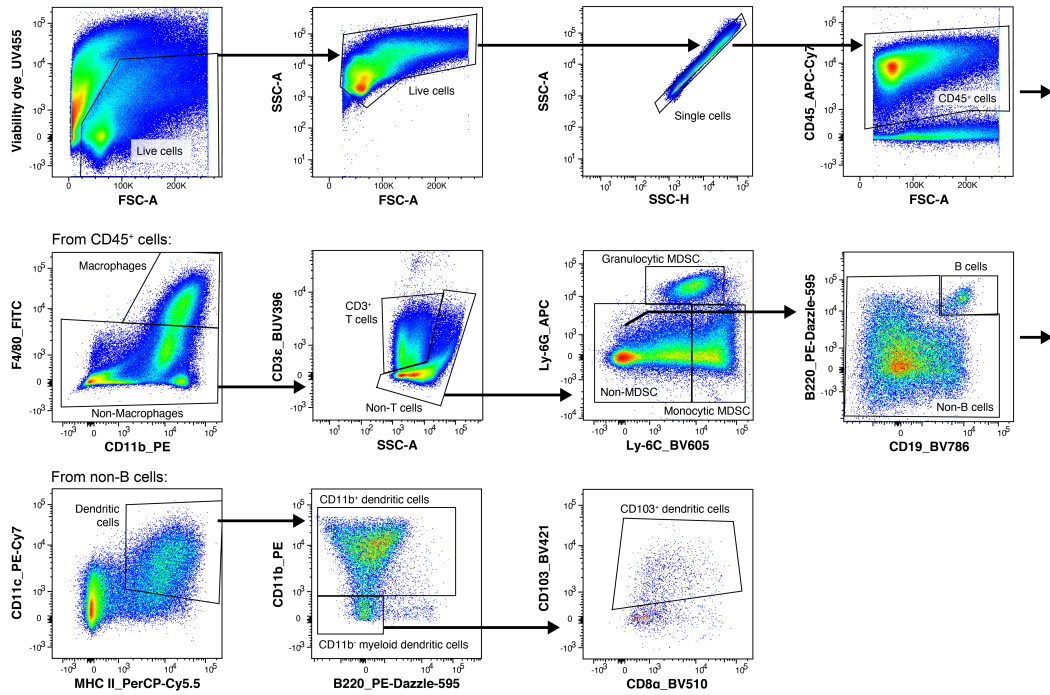

67

68

69 **Supplementary Fig. 3. Gating strategy for the characterization of B cells and myeloid**

70 **cell subsets.** Multi-colored flow cytometry was used to analyze the subsets of B cells and

71 myeloid cells in the tumors at day 10 post-injection. Subset of immune cells were defined

72 using the following markers: Macrophages (CD45<sup>+</sup>, F4/80<sup>+</sup>, CD11b<sup>+</sup>), Granylocytic myeloid-

73 derived suppressor cells (MDSC) (CD45<sup>+</sup>, F4/80<sup>-</sup>, CD3ε<sup>-</sup>, Ly6G<sup>+</sup>, Ly6C<sup>MID/HI</sup>), Monocytic

74 MDSC (CD45<sup>+</sup>, F4/80<sup>-</sup>, CD3ε<sup>-</sup>, Ly6G<sup>-</sup>, Ly6C<sup>HI</sup>), B cells (CD45<sup>+</sup>, F4/80<sup>-</sup>, CD3ε<sup>-</sup>, Ly6G<sup>-</sup>,

75 Ly6C<sup>LO/MID</sup>, CD19<sup>+</sup>, B220<sup>+</sup>), dendritic cells (DCs) (CD45<sup>+</sup>, F4/80<sup>-</sup>, CD3ε<sup>-</sup>, Ly6G<sup>-</sup>, Ly6C<sup>LO/MID</sup>,

76 CD11c<sup>+</sup>, MHCII<sup>+</sup>), CD11b<sup>+</sup> DCs (same than DCs with CD11b<sup>+</sup>), CD103<sup>+</sup> DCs (same than DCs

77 with CD11b<sup>-</sup>, B220<sup>-</sup>, CD103<sup>+</sup>).

78

79

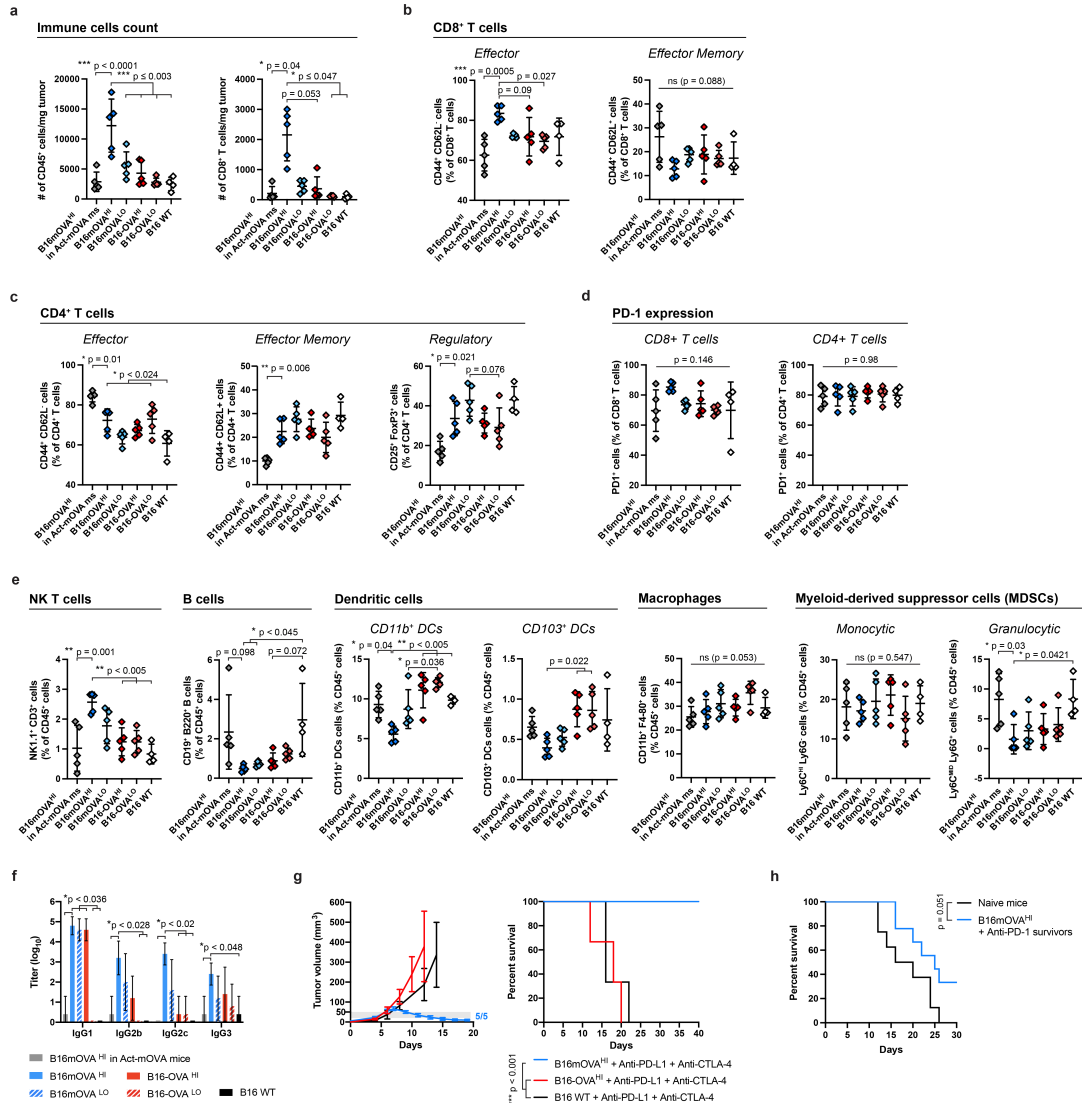

80

81 **Supplementary Fig. 4. Comparison of B16mOVA and B16-OVA melanoma tumor**  
 82 **immunogenicity and responsiveness to cancer immunotherapy in mice. a-e,** Flow  
 83 cytometry analysis of immune cells infiltrated in tumors 10 days post-injection (N≥4, mean ±  
 84 SD, ANOVA with Tukey's post-test and Brown-Forsythe correction when needed). **a,** Number  
 85 of CD45<sup>+</sup> immune cells and CD8<sup>+</sup> T cells per mg of tumor. **b,** CD8<sup>+</sup> and **c,** CD4<sup>+</sup> effector and  
 86 effector memory T cells subsets in the different tumors. **d,** Proportion of PD-1 expressing  
 87 CD8<sup>+</sup> and CD4<sup>+</sup> T cells. **e,** Proportion of NK T cells, B cells, dendritic cells, macrophages and  
 88 myeloid-derived suppressor cells relative to the total CD45<sup>+</sup> immune cell populations. **f,** Titers  
 89 (log<sub>10</sub>) of the anti-OVA measured per IgG subtype in the plasma of tumor-bearing mice at day  
 90 10, which corresponds Fig. 1d. (N≥4, mean ± SD, Kruskal-Wallis with Dunn's post-test per  
 91 IgG subtype). **g,** Tumor growth and associated survival of OVA-expressing tumor-bearing  
 92 mice treated with 100 μg of anti-PD-L1 and 100 μg of anti-CTLA-4 injected intraperitoneally  
 93 when the tumor volume reached 20-50 mm<sup>3</sup> (grey thresholds) (N≥3, mean ± SEM, log-rank  
 94 tests). **h,** Survival of mice re-challenged with B16-F10 WT tumor cells, associated to the  
 95 tumor growth curves presented in Fig. 1i (N≥8, mean ± SEM, log-rank test).

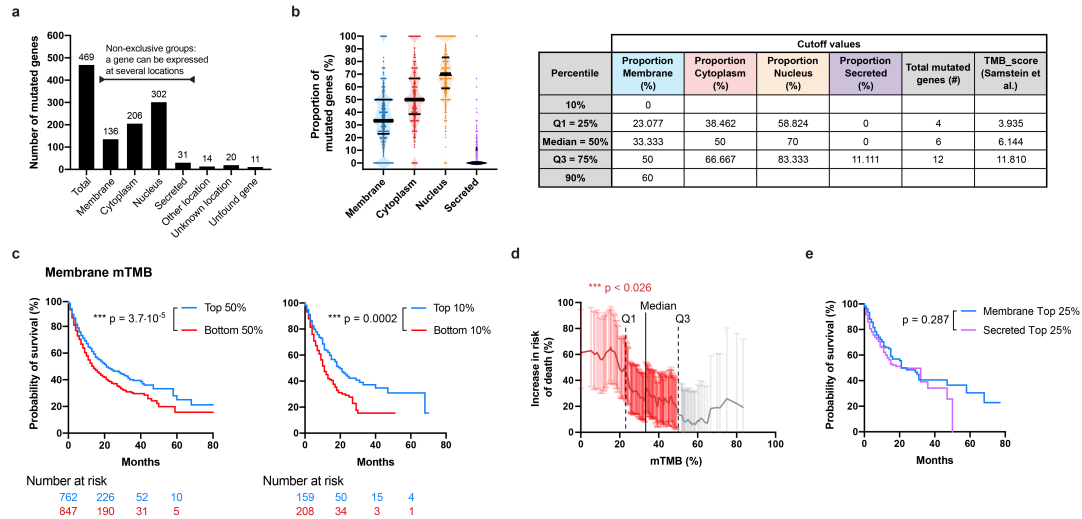

96

97

98

99

100

101

102

103

104

105

106

107

108

109

110

111

112

**Supplementary Data Fig. 5.** Analysis of tumor mutated genes' subcellular localizations and their subsequent impact on patient survival. **a**, Number of tumor mutated genes associated with each subcellular location among the 469 genes sequenced by MSK-IMPACT method. **b**, Proportion of tumor mutated genes per subcellular location in patients treated with immunotherapy in the pan-cancer group, and corresponding percentile cutoff values used for the analysis in Fig. 2. **c**, Survival of ICI-treated patients harboring high (Top 50% or 10%) or low (Bottom 50% or 10%) mTMB (log-rank tests). **d**, Increase in risk of death as a function of mTMB in ICI-treated patients in the pan-cancer group. Values are calculated as  $100 \cdot (\text{HR} - 1) \pm 95\% \text{ CI}$  with HR the hazard ratio for survival of patients that have less than the depicted proportion as compared to those that have more. As an example, ICI-treated patients that had less than Q1=23% of mutated genes at the membrane had a 50% increased risk of death as compared to those that have more than 23% membrane mutated genes (log-rank tests, red values = p-value  $\leq 0.05$ , grey values = not significant). **e**, Survival of ICI-treated patients with high (Top 25%) mTMB and sTMB (log-rank test).

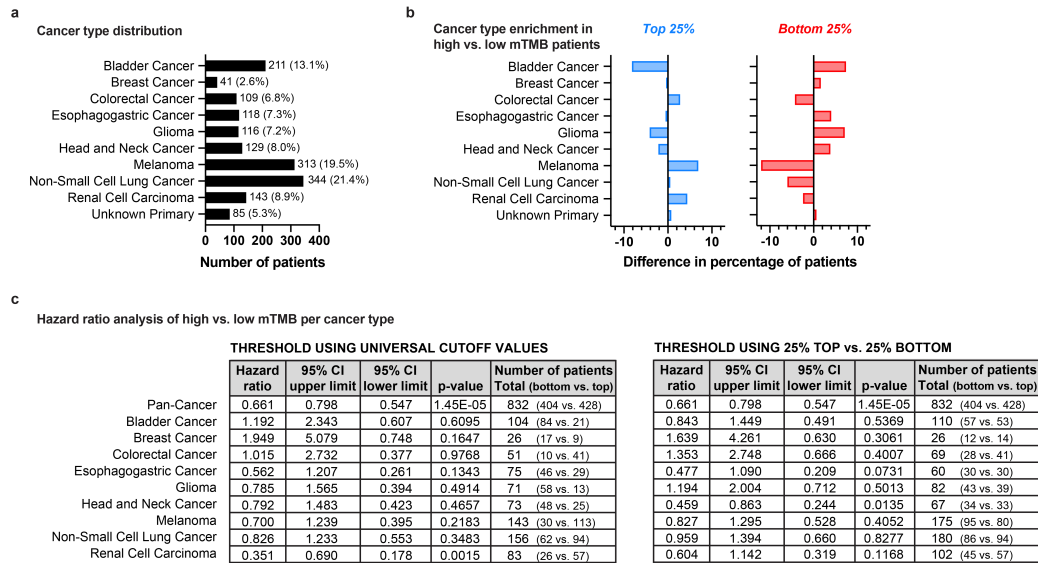

113

114

115

116

117

118

119

120

121

122

**Supplementary Fig. 6. Distributions of patients by cancer types and according to their mTMB.** **a**, Distribution of the ICI-treated patients per cancer type included in the pan-cancer analysis. **b**, Differences in patient distribution per cancer type for the groups with high (Top 25%) or low (Bottom 25%) mTMB, as compared to the distribution of the entire ICI-treated cohort as in panel a. **c**, Values of the HRs, 95% confidence intervals, p-value of the log-rank tests and number of patients used in Fig. 3b, for the universal cutoff and the 25% top vs. bottom strategies.

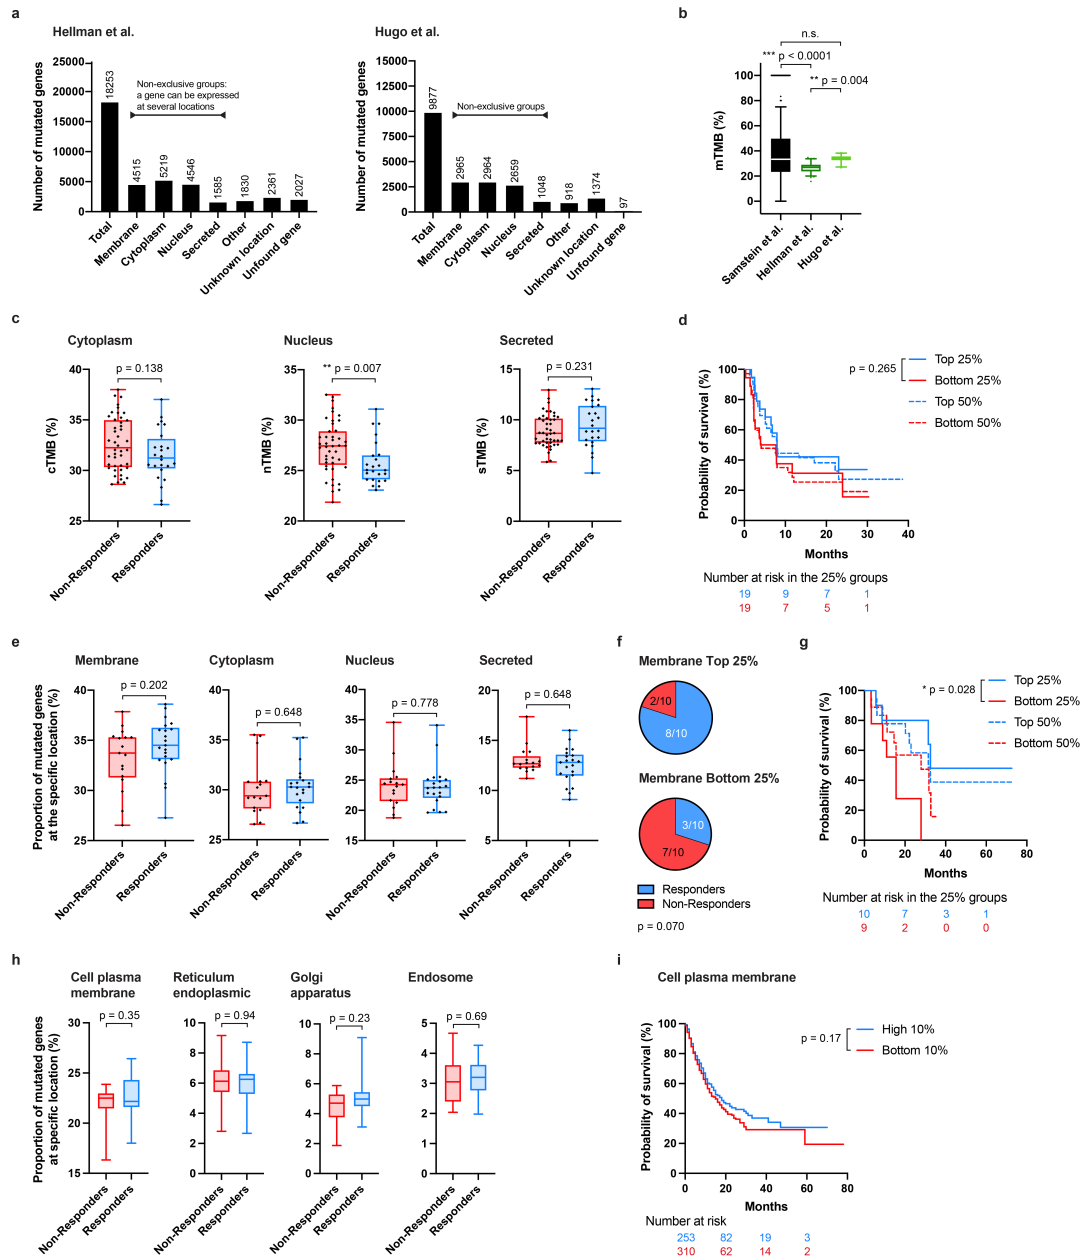

123

124 **Supplementary Fig. 7. Response to immunotherapy based on the proportion of**

125 **mutated genes at specific subcellular localizations.** Patients (N=75) with non-small cell

126 lung cancer were treated with anti-PD-1 + anti-CTLA-4 in the cohort from Hellman *et al.*<sup>8</sup>, and

127 patients (N=38) with advanced melanoma cancer were treated with anti-PD-1 in the cohort

128 from Hugo *et al.*<sup>9</sup>. In both studies, tumor mutated genes were sequenced by the WES

129 method. **a**, Number of tumor mutated genes detected across all patients in the Hellman *et al.*

130 and Hugo *et al.* studies, respectively, and their associated subcellular locations.

131 **b**, Comparison of the mTMB found in ICI-treated patient cohorts from the studies by Samstein

132 *et al.*<sup>7</sup>, Hellman *et al.*<sup>8</sup> and Hugo *et al.*<sup>9</sup> **c**, Proportion of mutated genes per subcellular location

133 in patients that responded or not to immunotherapy in the Hellman *et al.* cohort (Mann-

134 Whitney test). **d**, Survival of patients with high (Top 25% and 50%) or low (Bottom 25% and

135 50%) mTMB in the Hellman *et al.*<sup>8</sup> cohort (log-rank test). **e**, Same as in panel c, but with the

136 patient cohort from Hugo *et al.*<sup>9</sup> **f**, Proportion of responders or non-responders to anti-PD-1  
137 among patients that have high (Top 25%) or low (Bottom 25%) mTMB in the Hugo *et al.*<sup>9</sup>  
138 cohort (Fisher's exact test). **g**, Same as in panel d, but with the patient cohort from Hugo *et*  
139 *al.*<sup>9</sup>. **h**, Proportion of mutated genes at the cell plasma membrane or in other specific  
140 membrane-containing cell organelles in responders and non-responders to immunotherapy  
141 from the Hugo *et al.*<sup>9</sup> **i**, Survival of the patients with high (Top 10%) or low (Bottom 10%)  
142 proportion of mutated genes expressing proteins at the tumor cell plasma membrane for the  
143 pan-cancer groups from the cohort from Samstein *et al.*<sup>7</sup>  
144  
145

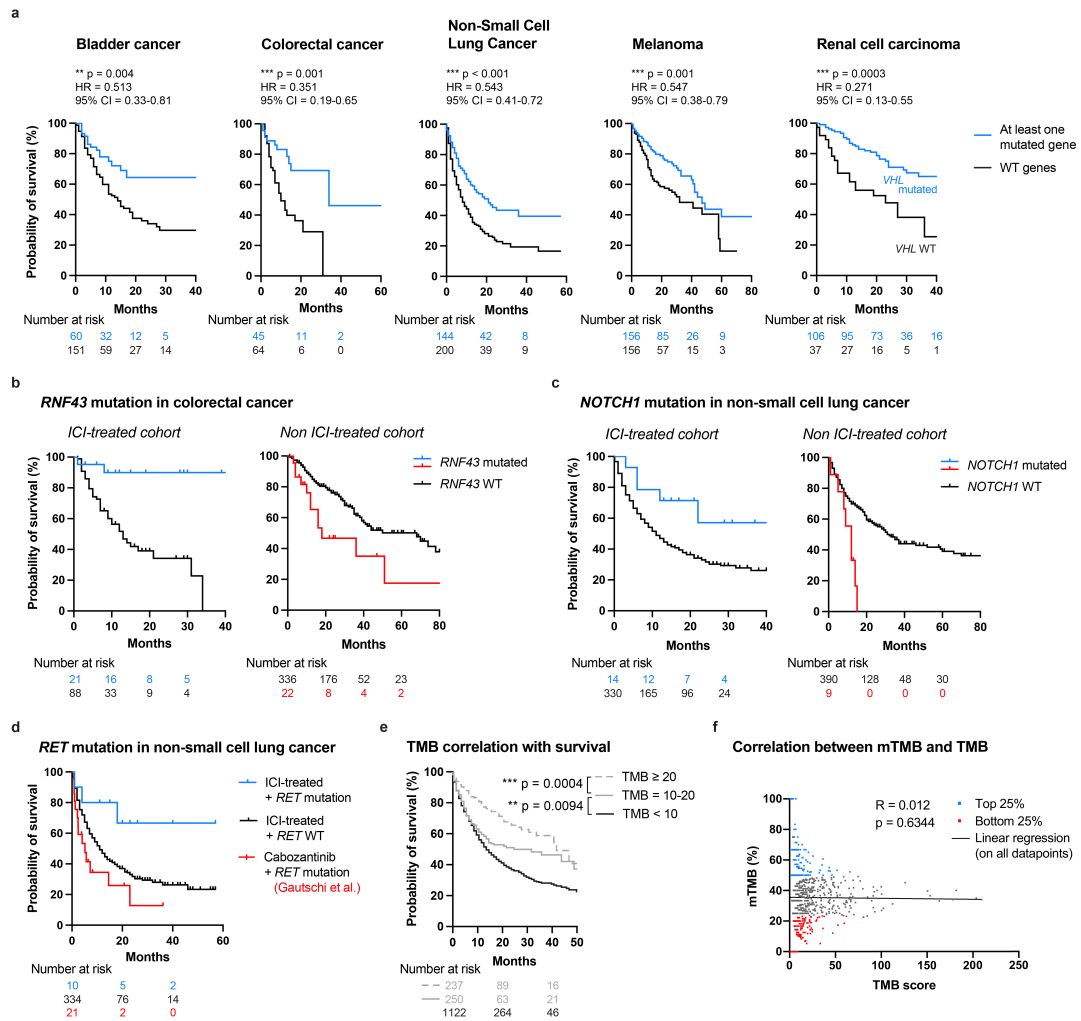

146

147

148

149

150

151

152

153

154

155

156

157

158

159

**Supplementary Fig. 8. Potential use of mTMB and specific membrane-associated mutated genes as predictive clinical biomarkers for extended survival upon ICI.** Data analyzed from Samstein *et al.*<sup>7</sup> ICI-treated or non-ICI-treated cohorts. **a**, Survival of patients bearing at least one mutated genes among the cancer-specific list of genes highlighted in blue in Fig. 5a, as compared to patients with no mutated genes among the list. **b**, Survival curves of ICI and non-ICI treated patients bearing *RNF43* mutations in colorectal cancer. **c**, Survival curves of ICI and non-ICI treated patients bearing *NOTCH1* mutations in NSCLC. **d**, Comparison of survival of patients carrying *RET* mutations in NSCLC treated with ICI or with a standard-of-care cabozantinib (data from Gautschi *et al.*<sup>25</sup>). **e**, Survival curves of patients from the pan-cancer group in function of their TMB level (in mut/Mbp). The higher the TMB the longer the survival (log-rank test). **f**, Correlation between mTMB and total TMB. No correlation was observed between these two parameters (Spearman correlation).
